# Supplementary material for: Application of Reichardt’s Solvent Polarity Scale (ET(30)) in the Selection of Bonding Agents for Composite Solid Rocket Propellants
Source: MDPI journal article supplement (doi:10.3390/liquids2040017), 2022-09-27
Supplement: s1 [file s1]

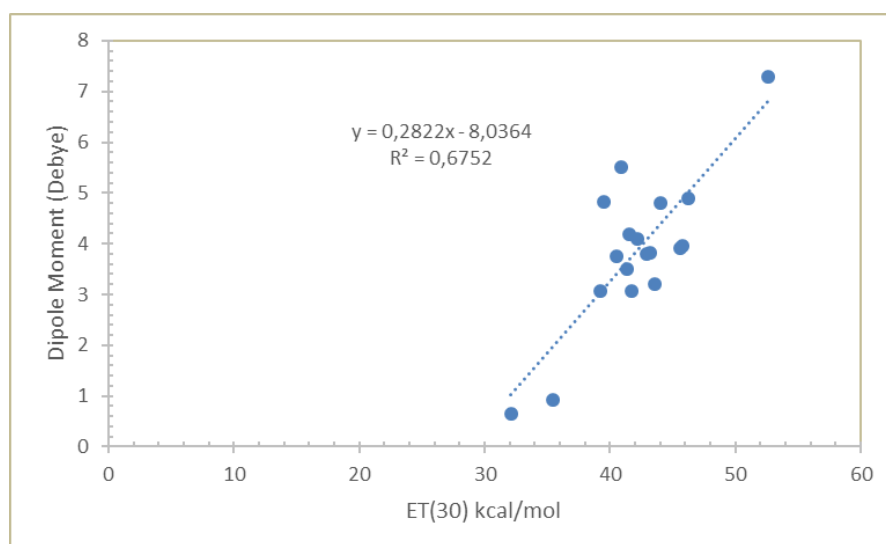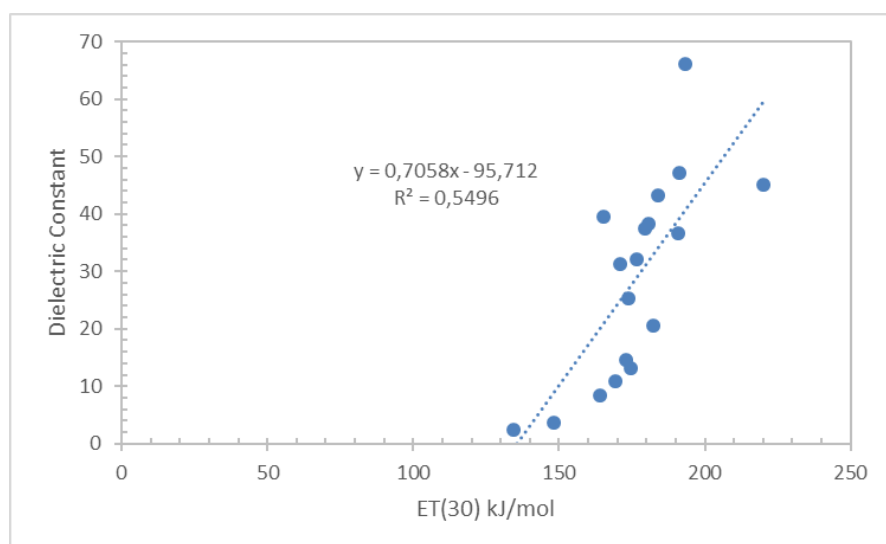

**Supplementary Figure S1.** Correlation of  $E_T(30)$  values taken from Table 1 with the dipole moments of the selected liquids (top picture); correlation of  $E_T(30)$  values taken from Table 1 with the dielectric constants of the selected liquids (bottom picture). Only TEA and DEA were excluded from these graphs because their high  $E_T(30)$  values are not supported by high dipole moment ( $\mu$ ) and dielectric constant ( $\epsilon$ ) values, demonstrating that  $E_T(30)$  in certain cases is able to evidence certain special properties of liquids which are not disclosed by the traditional polarity parameters of  $\mu$  and  $\epsilon$ .
