# Supplementary material for: Application of Reichardt’s Solvent Polarity Scale (ET(30)) in the Selection of Bonding Agents for Composite Solid Rocket Propellants
Source: MDPI journal article supplement (doi:10.3390/liquids2040017), 2022-09-27
Supplement: s1 [file s1]

Archive with 1 entries (1 files):
- liquids-1918942-supplementary.pdf
